# Supplementary material for: Caesarean sections, indications and outcomes: a cross-sectional study using the Robson classification in a tertiary hospital in Sierra Leone
Source: PubMed Central journal article supplement (PMC11409385; doi:10.1136/bmjopen-2023-081143), 2024-09-03
Supplement: bmjopen-14-9-s001.pdf [file bmjopen-14-9-s001.pdf]

Supplemental Table. The Robson reporting table and neonatal outcomes by Robson group, PCMH Hospital, Sierra Leone, October 2020 – January 2021 (n = 1998)

| GROUP*         | N. of women in the group | Number of CS in the group | Group size (%) | Group CS rate (%) | Absolute group contribution to overall CS rate (%) | Relative contribution of group to overall CS rate (%) | Maternal Death (N death woman/live births (%)) | Livebirth (N livebirths/total deliveries in the group (%)) | Fresh Stillbirth (N Fresh stillbirths/total deliveries in the group (%)) | Macerated Stillbirth (N Macerated stillbirth/total deliveries in the group (%)) | Early Neonatal Death**† (N neonatal deaths/total deliveries (%)) | APGAR <7 at 5 minutes (N live birth Apgar <7/total live birth (%)) |
|----------------|--------------------------|---------------------------|----------------|-------------------|----------------------------------------------------|-------------------------------------------------------|------------------------------------------------|------------------------------------------------------------|--------------------------------------------------------------------------|---------------------------------------------------------------------------------|------------------------------------------------------------------|--------------------------------------------------------------------|
| 1              | 559                      | 238                       | 28.0           | 42.6              | 11.9                                               | 24.0                                                  | 1 (0.05)                                       | 536 (95.9)                                                 | 18 (3.2)                                                                 | 2 (0.4)                                                                         | 3 (0.5)                                                          | 83 (15.5)                                                          |
| 2              | 71                       | 58                        | 3.6            | 81.7              | 2.9                                                | 5.9                                                   | 0                                              | 59 (83.1)                                                  | 12 (16.9)                                                                | -                                                                               | -                                                                | 10 (16.9)                                                          |
| 2:00 AM        | 19                       | 6                         | 1.0            | 31.6              | 0.3                                                | 0.6                                                   | 0                                              | 13 (68.4)                                                  | 6 (31.6)                                                                 | -                                                                               | -                                                                | 3 (23.1)                                                           |
| 2 b            | 52                       | 52                        | 2.6            | 100               | 2.6                                                | 5.2                                                   | 0                                              | 46 (88.5)                                                  | 6 (11.5)                                                                 | -                                                                               | -                                                                | 7 (15.2)                                                           |
| 3              | 763                      | 249                       | 38.2           | 32.6              | 12.5                                               | 25.1                                                  | 2                                              | 718 (94.1)                                                 | 35 (4.6)                                                                 | 6 (0.8)                                                                         | 4 (0.5)                                                          | 101 (14.1)                                                         |
| 4              | 80                       | 63                        | 4.0            | 78.8              | 3.2                                                | 6.4                                                   | 1 (0.05)                                       | 69 (86.3)                                                  | 10 (12.5)                                                                | 1 (1.3)                                                                         | -                                                                | 17 (24.6)                                                          |
| 4:00 AM        | 24                       | 7                         | 1.2            | 29.2              | 0.4                                                | 0.7                                                   | 0                                              | 19 (79.2)                                                  | 5 (20.8)                                                                 | -                                                                               | -                                                                | 6 (31.6)                                                           |
| 4 b            | 56                       | 56                        | 2.8            | 100               | 2.8                                                | 5.6                                                   | 1 (0.05)                                       | 50 (89.3)                                                  | 5 (8.9)                                                                  | 1 (1.8)                                                                         | -                                                                | 11 (22.0)                                                          |
| 5              | 171                      | 163                       | 8.6            | 95.3              | 8.2                                                | 16.4                                                  | 0                                              | 165 (96.5)                                                 | 6 (3.5)                                                                  | -                                                                               | -                                                                | 15 (9.1)                                                           |
| 6              | 46                       | 33                        | 2.3            | 71.7              | 1.7                                                | 3.3                                                   | 0                                              | 38 (82.6)                                                  | 7 (15.2)                                                                 | -                                                                               | 1 (2.2)                                                          | 14 (36.8)                                                          |
| 7              | 58                       | 40                        | 2.9            | 69.0              | 2.0                                                | 4.0                                                   | 0                                              | 51 (87.9)                                                  | 6 (10.3)                                                                 | 1 (1.7)                                                                         | -                                                                | 18 (35.3)                                                          |
| 8              | 99                       | 66                        | 4.9            | 66.7              | 3.3                                                | 6.7                                                   | 2 (0.1)                                        | 93 (93.9)                                                  | 5 (5.1)                                                                  | 1 (1.0)                                                                         | -                                                                | 10 (10.8)                                                          |
| 9              | 21                       | 20                        | 1.0            | 95.2              | 1.0                                                | 2.0                                                   | 0                                              | 20 (95.2)                                                  | 1 (4.8)                                                                  | -                                                                               | -                                                                | 3 (15.0)                                                           |
| 10             | 107                      | 54                        | 5.4            | 50.5              | 2.7                                                | 5.4                                                   | 3 (0.1)                                        | 71 (66.4)                                                  | 33 (30.8)                                                                | 3 (2.8)                                                                         | -                                                                | 22 (31.0)                                                          |
| Unclassifiable | 23                       | 8                         | 1.1            | 34.8              | 0.4                                                | 0.8                                                   | Missing                                        | 18 (78.3)                                                  | Missing                                                                  | Missing                                                                         | Missing                                                          | 1 (5.6)                                                            |
| <b>TOT</b>     | <b>1998</b>              | <b>992</b>                | <b>100</b>     | <b>49.6</b>       | <b>49.6</b>                                        | <b>100</b>                                            | <b>9 (0.5)</b>                                 | <b>1838 (92.0)</b>                                         | <b>133 (6.7)</b>                                                         | <b>14 (0.7)</b>                                                                 | <b>8 (0.4)</b>                                                   | <b>294 (16.0)</b>                                                  |

\*Birth weight  $\geq 2500$  g was used as proxy for gestational age  $>37$  weeks

\*\*Early neonatal death was defined as the death of a live born neonate by discharge or day 7 of life (whichever occurred first)

CS. caesarean section

Group size (%) = n of women in the group / total N women delivered in the hospital x 100

Group CS rate (%) = n of CS in the group / total N of women in the group x 100

Absolute contribution (%) = n of CS in the group / total N of women delivered in the hospital x 100

Relative contribution (%) = n of CS in the group / total N of CS in the hospital x 100
